# Supplementary material for: Soluble CD200 Is Critical to Engraft Chronic Lymphocytic Leukemia Cells in Immunocompromised Mice
Source: Oxford University Press journal article supplement (doi:10.1158/0008-5472.can-12-1390), 2012-08-09
Supplement: 00085472can121390-sup-f5_125k.pdf [file 00085472can121390-sup-f5_125k.pdf]

S. Fig 5: Engraftment of CD19<sup>+</sup>CD5<sup>+</sup> CLL cells in peritoneal cavity

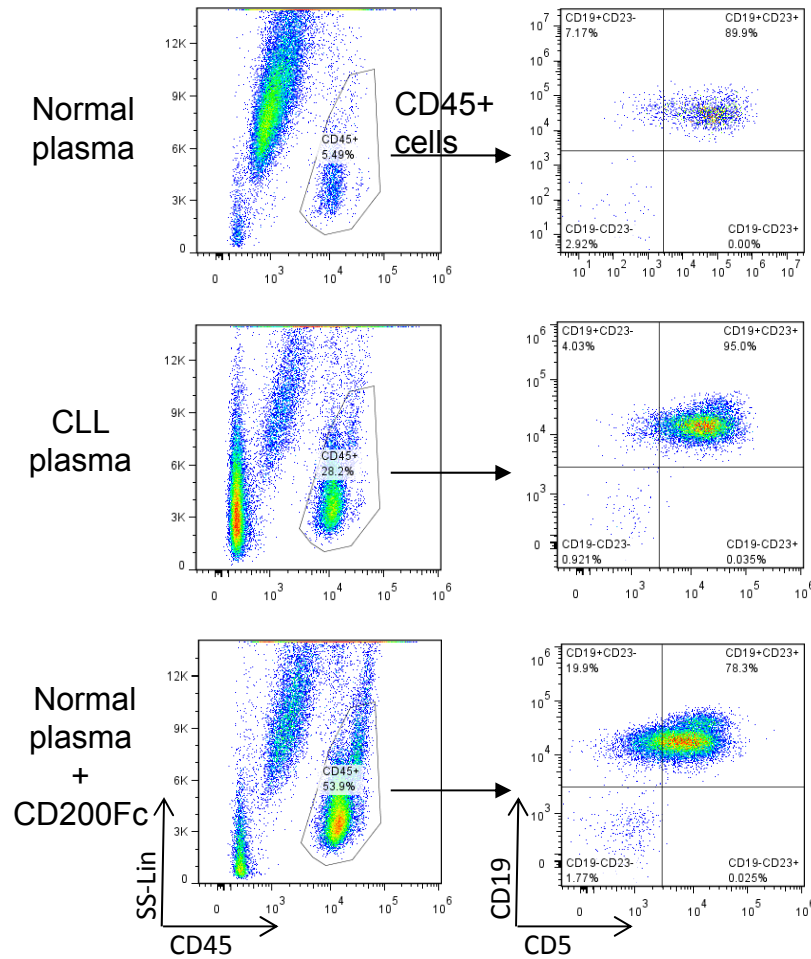

Figure legend:

CD19<sup>+</sup>CD5<sup>+</sup> CLL cells within the CD45<sup>+</sup> population in the peritoneal cavity of mice that received one of three plasma infusions: sCD200<sup>lo</sup> normal plasma (upper panel), sCD200<sup>hi</sup> CLL plasma (middle panel), or sCD200<sup>lo</sup> normal plasma + CD200Fc (lower panel). Representative data from individual animals from each group are shown.
